# Supplementary material for: Circulating miRNAs miR-34a and miR-150 associated with colorectal cancer progression
Source: BMC Cancer. 2015 Apr 30;15:329. doi: 10.1186/s12885-015-1327-5 (PMC4417244; doi:10.1186/s12885-015-1327-5)
Supplement: Additional file 2: — AUC values for miR-34a, miR-150, and miR-923 in the validation cohort. [file 12885_2015_1327_MOESM2_ESM.xls]

## Sheet: Sheet1
Additional File 2
AUC values for miR-34a, miR-150, and miR-923 in the validation cohort.
	miR-34a	miR-150	miR-923
Normal vs Polyp	0.610 (CI: 0.430-0.790)	0.640 (CI: 0.460-0.820)	0.600 (CI: 0.339-0.716)
Normal vs Adenoma	0.720 (CI: 0.559-0.882)	0.660 (CI: 0.477-0.843)	0.603 (CI: 0.420-0.785)
Normal vs Early Cancer	0.798 (CI: 0.664-0.932)	0.524 (CI: 0.343-0.704)	0.574 (CI: 0.393-0.755)
Normal vs Late Cancer	0.696 (CI: 0.516-0.877)	0.629 (CI: 0.438-0.819)	0.625 (CI: 0.431-0.820)
Polyp vs Adenoma	0.795 (CI: 0.655-0.935)	0.540 (CI: 0.355-0.725)	0.488 (CI: 0.437-0.803)
Polyp vs Early Cancer	0.872 (CI: 0.763-0.980)	0.654 (CI: 0.477-0.832)	0.548 (CI: 0.432-0.781)
Polyp vs Late Cancer	0.796 (CI: 0.646-0.947)	0.825 (CI: 0.681-0.969)	0.746 (CI: 0.412-0.817)
Adenoma vs Early Cancer	0.585 (CI: 0.410-0.760)	0.691 (CI: 0.511-0.872)	0.524 (CI: 0.343-0.705)
Adenoma vs Late Cancer	0.543 (CI: 0.342-0.744)	0.875 (CI: 0.754-0.996)	0.732 (CI: 0.554-0.910)
Early Cancer vs Late Cancer	0.652 (CI: 0.468-0.837)	0.578 (CI: 0.388-0.767)	0.721 (CI: 0.541-0.900)
Non-Cancer vs Early Cancer	0.751 (CI: 0.631-0.872)	0.623 (CI: 0.461-0.786)	0.552 (CI: 0.418-0.686)
Non-Cancer vs Cancer	0.713 (CI: 0.609-0.817)	0.681 (CI: 0.561-0.801)	0.527 (CI: 0.408-0.646)
Normal & Polyp vs Adenoma	0.758 (CI: 0.620-0.895)	0.600 (CI: 0.457-0.743)	0.611 (CI: 0.459-0.764)
